# Supplementary material for: Development and Evaluation of a Novel-Thymol@Natural-Zeolite/Low-Density-Polyethylene Active Packaging Film: Applications for Pork Fillets Preservation
Source: MDPI journal article supplement (doi:10.3390/antiox12020523), 2023-02-19
Supplement: s1 [file s1]

## Supplementary material

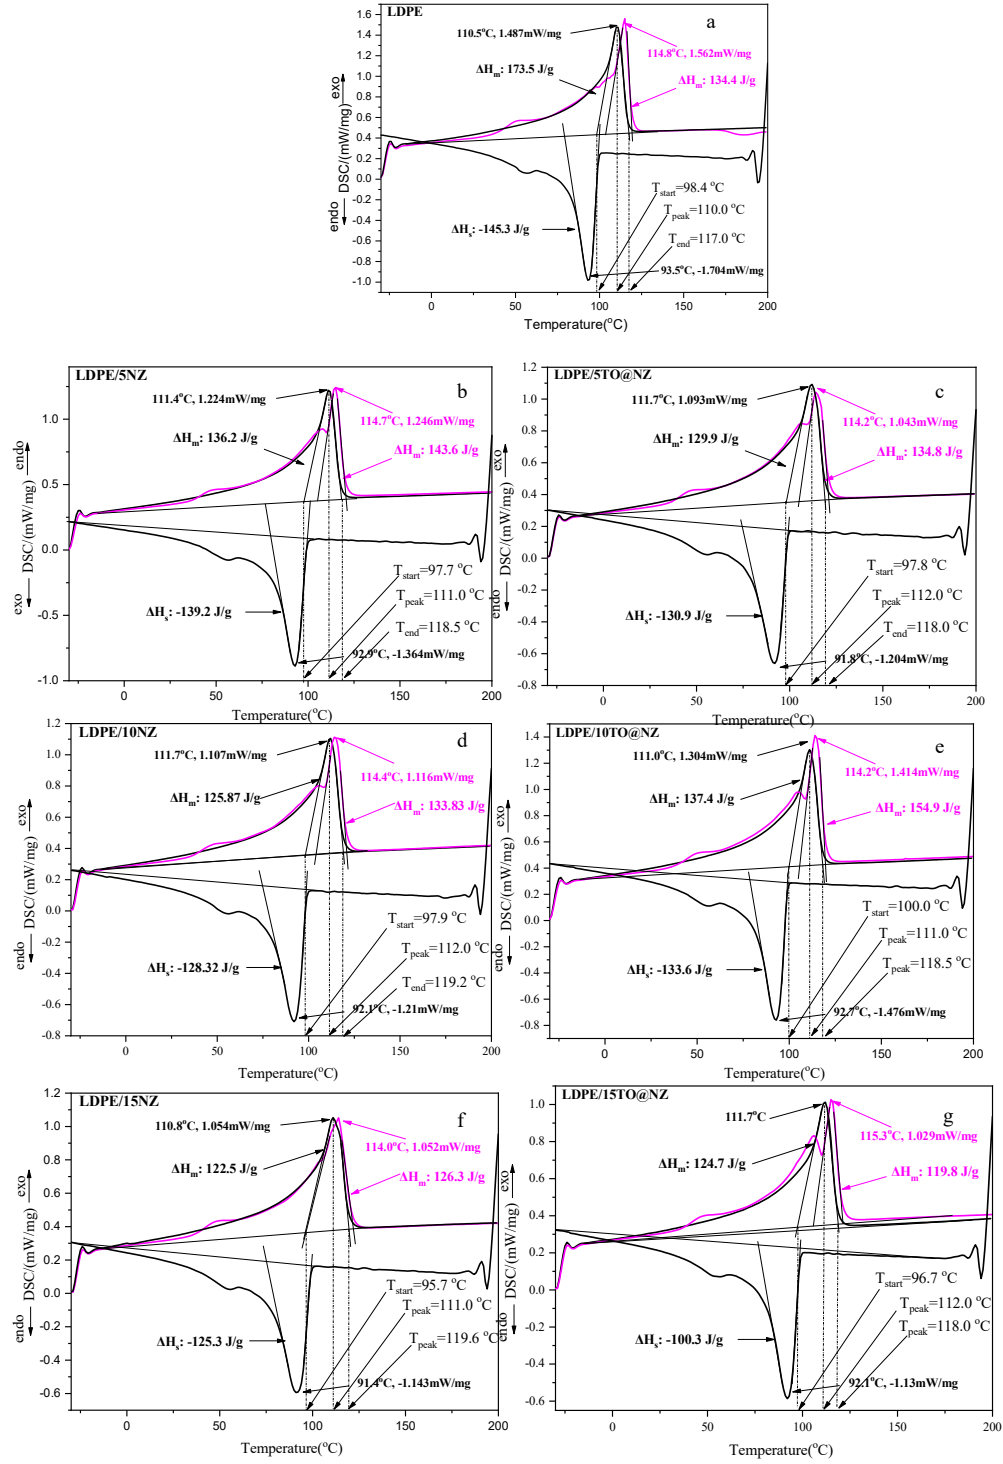

**Figure S1.** DSC plots of (a) pure LDPE, (b) LDPE/5NZ, (c) LDPE/5TO@NZ, (d) LDPE/10NZ, (e) LDPE/10TO@NZ, (f) LDPE/15NZ and (g) LDPE/15TO@NZ

**Table S1.** GC-MS analysis of thyme oil as received

| Peak | Label                                                                                        | Area Sum<br>% |
|------|----------------------------------------------------------------------------------------------|---------------|
| 1    | Cpd 1: .ALPHA.-PINENE, (-)-; C10 H16; 6.658                                                  | 0.81          |
| 2    | Cpd 2: Camphene; C10 H16; 7.148                                                              | 0.25          |
| 3    | Cpd 3: Sabinene; C10 H16; 8.171                                                              | 0.11          |
| 4    | Cpd 4: .beta.-Myrcene; C10 H16; 8.864                                                        | 0.56          |
| 5    | Cpd 5: Cyclohexene, 1-methyl-4-(1-methylethenyl)-, (R)-; C10 H16; 9.298                      | 0.09          |
| 6    | Cpd 6: .ALPHA. TERPINENE; C10 H16; 9.802                                                     | 0.72          |
| 7    | Cpd 7: Cyclohexane, 1-methyl-3-(1-methylethenyl)-, cis-; C10 H18; 9.998                      | 0.12          |
| 8    | <b>Cpd 8: Benzene, 1-methyl-4-(1-methylethyl)-; C10 H14; 10.145 ή p-cymene</b>               | <b>12.28</b>  |
| 9    | <b>Cpd 9: D-Limonene; C10 H16; 10.341</b>                                                    | <b>16.54</b>  |
| 10   | Cpd 10: .gamma.-Terpinene; C10 H16; 11.616                                                   | 0.34          |
| 11   | Cpd 11: .alpha.-terpinolene; C10 H16; 12.890                                                 | 0.23          |
| 12   | Cpd 12: Linalool; C10 H18 O; 13.497                                                          | 1.67          |
| 13   | Cpd 13: Camphor; C10 H16 O; 15.292                                                           | 0.11          |
| 14   | Cpd 14: Cyclohexanol, 1-methyl-4-(1-methylethenyl)-; C10 H18 O; 15.390                       | 0.08          |
| 15   | Cpd 15: Bicyclo[2.2.1]heptan-2-ol, 1,7,7-trimethyl-, exo-; C10 H18 O; 15.845                 | 0.1           |
| 16   | Cpd 16: endo-Borneol; C10 H18 O; 16.265                                                      | 0.41          |
| 17   | Cpd 17: .ALPHA.-TERPINEOL; C10 H18 O; 17.462                                                 | 4.21          |
| 18   | Cpd 18: Cyclohexanol, 1-methyl-4-(1-methylethylidene)-; C10 H18 O; 17.778                    | 0.52          |
| 19   | Cpd 19: Fenchyl acetate; C12 H20 O2; 18.821                                                  | 0.26          |
| 20   | Cpd 20: Cyclohexanol, 2-methylene-3-(1-methylethyl)-, acetate, cis-; C12 H20 O2; 20.228      | 0.12          |
| 21   | Cpd 21: Bicyclo[2.2.1]heptan-2-ol, 1,7,7-trimethyl-, acetate, (1S-endo)-; C12 H20 O2; 21.831 | 2.89          |
| 22   | <b>Cpd 22: Phenol, 5-methyl-2-(1-methylethyl)-; C10 H14 O; 22.273 OR THYMOL</b>              | <b>32.54</b>  |
| 23   | <b>Cpd 23: Phenol, 5-methyl-2-(1-methylethyl)-; C10 H14 O; 22.651 OR THYMOL</b>              | <b>24.16</b>  |
| 24   | Cpd 24: Tetradecane; C14 H30; 26.754                                                         | 0.11          |
| 25   | Cpd 25: TRANS.(BETA.)-CARYOPHYLLENE; C15 H24; 27.251                                         | 0.36          |
| 26   | Cpd 26: Hexadecane; C16 H34; 34.638                                                          | 0.17          |
| 27   | Cpd 27: Octadecane; C18 H38; 41.781                                                          | 0.07          |
| 28   | Cpd 28: Hexadecanoic acid, 2-hydroxy-1-(hydroxymethyl)ethyl ester; C19 H38 O4; 60.105        | 0.19          |

**Table S2.** GC-MS analysis of the collected after the distillation process thyme oil rich in Limonene and p- Cymene fraction.

| Label                                                                                 | Area Sum %   |
|---------------------------------------------------------------------------------------|--------------|
| Cpd 1: l-Phellandrene; C10 H16; 6.462                                                 | 0.15         |
| Cpd 2: .ALPHA.-PINENE, (-)-; C10 H16; 6.658                                           | 3.7          |
| Cpd 3: Camphene; C10 H16; 7.141                                                       | 1.52         |
| Cpd 4: 2-.BETA.-PINENE; C10 H16; 8.171                                                | 0.35         |
| Cpd 5: .beta.-Myrcene; C10 H16; 8.864                                                 | 1.68         |
| Cpd 6: Cyclohexane, 1-methylene-4-(1-methylethenyl)-; C10 H16; 9.263                  | 0.18         |
| Cpd 7: 3-Carene; C10 H16; 9.522                                                       | 0.1          |
| Cpd 8: .ALPHA. TERPINENE; C10 H16; 9.809                                              | 0.33         |
| <b>Cpd 9: Benzene, 1-methyl-4-(1-methylethyl)-; C10 H14; 10.194-p cymene</b>          | <b>31.98</b> |
| <b>Cpd 10: D-Limonene; C10 H16; 10.397</b>                                            | <b>31.83</b> |
| Cpd 11: .gamma.-Terpinene; C10 H16; 11.623                                            | 0.07         |
| Cpd 12: 12.918                                                                        | 0.15         |
| Cpd 13: Linalool; C10 H18 O; 13.499                                                   | 2.09         |
| Cpd 14: D-Fenchyl alcohol; C10 H18 O; 13.940                                          | 0.08         |
| Cpd 15: 3-Cyclohexen-1-ol, 1-methyl-4-(1-methylethyl)-; C10 H18 O; 14.935             | 0.22         |
| Cpd 16: Cyclohexanol, 1-methyl-4-(1-methylethenyl)-; C10 H18 O; 15.390                | 0.12         |
| Cpd 17: 15.845                                                                        | 0.19         |
| Cpd 18: endo-Borneol; C10 H18 O; 16.258                                               | 0.3          |
| Cpd 19: 3-Cyclohexen-1-ol, 4-methyl-1-(1-methylethyl)-; C10 H18 O; 16.825             | 0.06         |
| Cpd 20: .ALPHA.-TERPINEOL; C10 H18 O; 17.453                                          | 1.77         |
| Cpd 21: Cyclohexanol, 1-methyl-4-(1-methylethylidene)-; C10 H18 O; 17.777             | 0.23         |
| Cpd 22: Fenchyl acetate; C12 H20 O2; 18.814                                           | 0.14         |
| Cpd 23: Isobornyl acetate; C12 H20 O2; 21.762                                         | 0.63         |
| <b>Cpd 24: Phenol, 5-methyl-2-(1-methylethyl)-; C10 H14 O; 22.210</b>                 | <b>13.31</b> |
| <b>Cpd 25: Phenol, 5-methyl-2-(1-methylethyl)-; C10 H14 O; 22.574</b>                 | <b>8.32</b>  |
| Cpd 26: Tetradecane; C14 H30; 26.754                                                  | 0.09         |
| Cpd 27: Hexadecane; C16 H34; 34.638                                                   | 0.15         |
| Cpd 28: Hexadecanoic acid, 2-hydroxy-1-(hydroxymethyl)ethyl ester; C19 H38 O4; 60.105 | 0.23         |

**Table S3.** GC-MS results of the remaining after the distillation process thyme oil rich in thymol (TO) fraction

| Peak | Label                                                                                        | Area<br>Sum % |
|------|----------------------------------------------------------------------------------------------|---------------|
| 1    | Cpd 1: Camphene; C10 H16; 7.142                                                              | 0.18          |
| 2    | Cpd 2: Benzene, 1-methyl-4-(1-methylethyl)-; C10 H14; 10.131                                 | 0.99          |
| 3    | Cpd 3: D-Limonene; C10 H16; 10.292                                                           | 0.97          |
| 4    | Cpd 4: Linalool; C10 H18 O; 13.492                                                           | 0.69          |
| 5    | Cpd 5: 3-Cyclohexen-1-ol, 1-methyl-4-(1-methylethyl)-; C10 H18 O; 14.942                     | 0.21          |
| 6    | Cpd 6: Camphor; C10 H16 O; 15.278                                                            | 0.15          |
| 7    | Cpd 7: Cyclohexanol, 1-methyl-4-(1-methylethenyl)-; C10 H18 O; 15.383                        | 0.17          |
| 8    | Cpd 8: 15.838                                                                                | 0.19          |
| 9    | Cpd 9: Bicyclo[2.2.1]heptan-2-ol, 1,7,7-trimethyl-, exo-; C10 H18 O; 16.258                  | 0.54          |
| 10   | Cpd 10: 3-Cyclohexen-1-ol, 4-methyl-1-(1-methylethyl)-; C10 H18 O; 16.825                    | 0.11          |
| 11   | Cpd 11: .ALPHA.-TERPINEOL; C10 H18 O; 17.463                                                 | 1.65          |
| 12   | Cpd 12: Cyclohexanol, 1-methyl-4-(1-methylethylidene)-; C10 H18 O; 17.778                    | 0.54          |
| 13   | Cpd 13: 18.611                                                                               | 0.09          |
| 14   | Cpd 14: Fenchyl acetate; C12 H20 O2; 18.821                                                  | 0.54          |
| 15   | Cpd 15: Ascaridole; C10 H16 O2; 20.249                                                       | 0.19          |
| 16   | Cpd 16: Isobornyl acetate; C12 H20 O2; 21.748                                                | 0.36          |
| 17   | Cpd 17: Bicyclo[2.2.1]heptan-2-ol, 1,7,7-trimethyl-, acetate, (1S-endo)-; C12 H20 O2; 21.867 | 3.38          |
| 18   | <b>Cpd 18: Phenol, 5-methyl-2-(1-methylethyl)-; C10 H14 O; 22.294</b>                        | <b>46.61</b>  |
| 19   | <b>Cpd 19: Phenol, 5-methyl-2-(1-methylethyl)-; C10 H14 O; 22.679</b>                        | <b>40.09</b>  |
| 20   | Cpd 20: 25.592                                                                               | 0.18          |
| 21   | Cpd 21: Tetradecane; C14 H30; 26.747                                                         | 0.15          |
| 22   | Cpd 22: TRANS(.BETA.)-CARYOPHYLLENE; C15 H24; 27.251                                         | 0.33          |
| 23   | Cpd 23: 29.282                                                                               | 0.18          |
| 24   | Cpd 24: CARYOPHYLLENE OXIDE; C15 H24 O; 33.672                                               | 0.1           |
| 25   | Cpd 25: Hexadecane; C16 H34; 34.639                                                          | 0.21          |
| 26   | Cpd 26: 48.132                                                                               | 0.37          |
| 27   | Cpd 27: 48.426                                                                               | 0.39          |
| 28   | Cpd 28: 60.105                                                                               | 0.43          |

**Table S4.** Mass changes of LDPE/15NZ films as a function of time for temperature variation from 0 to 85 °C to calculate the water vapor content of the control film.

| Time<br>(s) | LDPE/15NZ_1                       |                            | LDPE/15NZ_2                       |                            | LDPE/15NZ_3                        |                            | LDPE/15NZ                        |
|-------------|-----------------------------------|----------------------------|-----------------------------------|----------------------------|------------------------------------|----------------------------|----------------------------------|
|             | average film thickness l 0.061 mm |                            | average film thickness l 0.119 mm |                            | average film thickness l 0.0781 mm |                            | -                                |
|             | $m_t$ (mg)                        | $\Delta m$ ( $m_t - m_0$ ) | $m_t$ (mg)                        | $\Delta m$ ( $m_t - m_0$ ) | $m_t$ (mg)                         | $\Delta m$ ( $m_t - m_0$ ) | average $\Delta m$ / water vapor |
| 0           | 520                               | 0                          | 690                               | 0                          | 605                                | 0                          | 0                                |
| 120         | 517                               | 3                          | 688                               | 2                          | 603                                | 3                          | 3                                |
| 240         | 516                               | 4                          | 688                               | 2                          | 602                                | 3                          | 3                                |
| 360         | 516                               | 4                          | 687                               | 3                          | 602                                | 4                          | 4                                |
| 480         | 516                               | 4                          | 686                               | 4                          | 601                                | 4                          | 4                                |
| 600         | 516                               | 4                          | 685                               | 5                          | 601                                | 5                          | 5                                |
| 720         | 516                               | 4                          | 685                               | 5                          | 601                                | 5                          | 5                                |
| 840         | 516                               | 4                          | 684                               | 6                          | 600                                | 5                          | 5                                |
| 960         | 516                               | 4                          | 683                               | 7                          | 600                                | 6                          | 6                                |
| 1080        | 516                               | 4                          | 683                               | 7                          | 600                                | 6                          | 6                                |
| 1200        | 516                               | 4                          | 683                               | 7                          | 600                                | 6                          | 6                                |
| 1320        | 516                               | 4                          | 683                               | 7                          | 600                                | 6                          | 6                                |
| 1440        | 516                               | 4                          | 683                               | 7                          | 600                                | 6                          | 6                                |
| 1560        | 516                               | 4                          | 683                               | 7                          | 600                                | 6                          | 6                                |
| 1680        | 516                               | 4                          | 683                               | 7                          | 600                                | 6                          | 6                                |
| 1800        | 516                               | 4                          | 683                               | 7                          | 600                                | 6                          | 6                                |
| 1920        | 516                               | 4                          | 683                               | 7                          | 600                                | 6                          | 6                                |
| 2040        | 516                               | 4                          | 683                               | 7                          | 600                                | 6                          | 6                                |
| 2160        | 516                               | 4                          | 683                               | 7                          | 600                                | 6                          | 6                                |

**Table S5.** Mass changes of LDPE/15TO@NZ films as a function of time for temperature variation from 0 to 90 °C in order to calculate the TO content released from the film.

| LDPE/15TO@NZ_1                    |                     |                              |                                 |                                                 | LDPE/15TO@NZ_2                    |                              |                                 |                                                 | LDPE/15TO@NZ_3                    |                              |                                 |                                                 |
|-----------------------------------|---------------------|------------------------------|---------------------------------|-------------------------------------------------|-----------------------------------|------------------------------|---------------------------------|-------------------------------------------------|-----------------------------------|------------------------------|---------------------------------|-------------------------------------------------|
| average film thickness l 0.075 mm |                     |                              |                                 |                                                 | average film thickness l 0.074 mm |                              |                                 |                                                 | Average film thickness l 0.086 mm |                              |                                 |                                                 |
| Time (s)                          | m <sub>t</sub> (mg) | m <sub>t</sub> + water vapor | m <sub>t</sub> / m <sub>∞</sub> | (m <sub>t</sub> / m <sub>∞</sub> ) <sup>2</sup> | m <sub>t</sub> (mg)               | m <sub>t</sub> + water vapor | m <sub>t</sub> / m <sub>∞</sub> | (m <sub>t</sub> / m <sub>∞</sub> ) <sup>2</sup> | m <sub>t</sub> (mg)               | m <sub>t</sub> + water vapor | m <sub>t</sub> / m <sub>∞</sub> | (m <sub>t</sub> / m <sub>∞</sub> ) <sup>2</sup> |
| 0                                 | 591                 | 591                          | 1.037                           | 1.075                                           | 545                               | 545                          | 1.036                           | 1.074                                           | 665                               | 665                          | 1.037                           | 1.076                                           |
| 120                               | 580                 | 583                          | 1.022                           | 1.044                                           | 534                               | 537                          | 1.020                           | 1.040                                           | 654                               | 657                          | 1.024                           | 1.049                                           |
| 240                               | 579                 | 582                          | 1.021                           | 1.043                                           | 533                               | 536                          | 1.019                           | 1.038                                           | 652                               | 655                          | 1.022                           | 1.044                                           |
| 360                               | 579                 | 583                          | 1.022                           | 1.044                                           | 532                               | 536                          | 1.018                           | 1.036                                           | 651                               | 655                          | 1.021                           | 1.043                                           |
| 480                               | 578                 | 582                          | 1.021                           | 1.043                                           | 532                               | 536                          | 1.019                           | 1.038                                           | 650                               | 654                          | 1.020                           | 1.041                                           |
| 600                               | 578                 | 583                          | 1.022                           | 1.044                                           | 532                               | 537                          | 1.020                           | 1.040                                           | 649                               | 654                          | 1.020                           | 1.039                                           |
| 720                               | 578                 | 583                          | 1.022                           | 1.044                                           | 531                               | 536                          | 1.018                           | 1.036                                           | 648                               | 653                          | 1.018                           | 1.036                                           |
| 840                               | 577                 | 582                          | 1.021                           | 1.043                                           | 531                               | 536                          | 1.019                           | 1.038                                           | 648                               | 653                          | 1.019                           | 1.038                                           |
| 960                               | 577                 | 583                          | 1.022                           | 1.044                                           | 531                               | 537                          | 1.020                           | 1.040                                           | 648                               | 654                          | 1.020                           | 1.039                                           |
| 1080                              | 577                 | 583                          | 1.022                           | 1.044                                           | 531                               | 537                          | 1.020                           | 1.040                                           | 647                               | 653                          | 1.018                           | 1.036                                           |
| 1200                              | 576                 | 582                          | 1.020                           | 1.041                                           | 531                               | 537                          | 1.020                           | 1.040                                           | 647                               | 653                          | 1.018                           | 1.036                                           |
| 1320                              | 576                 | 582                          | 1.020                           | 1.041                                           | 531                               | 537                          | 1.020                           | 1.040                                           | 647                               | 653                          | 1.018                           | 1.036                                           |
| 1440                              | 576                 | 582                          | 1.020                           | 1.041                                           | 531                               | 537                          | 1.020                           | 1.040                                           | 647                               | 653                          | 1.018                           | 1.036                                           |
| 1560                              | 576                 | 582                          | 1.020                           | 1.041                                           | 531                               | 537                          | 1.020                           | 1.040                                           | 646                               | 652                          | 1.016                           | 1.033                                           |
| 1680                              | 575                 | 581                          | 1.018                           | 1.037                                           | 531                               | 537                          | 1.020                           | 1.040                                           | 646                               | 652                          | 1.016                           | 1.033                                           |
| 1800                              | 575                 | 581                          | 1.018                           | 1.037                                           | 531                               | 537                          | 1.020                           | 1.040                                           | 646                               | 652                          | 1.016                           | 1.033                                           |
| 1920                              | 575                 | 581                          | 1.018                           | 1.037                                           | 531                               | 537                          | 1.020                           | 1.040                                           | 646                               | 652                          | 1.016                           | 1.033                                           |
| 2040                              | 575                 | 581                          | 1.018                           | 1.037                                           | 531                               | 537                          | 1.020                           | 1.040                                           | 646                               | 652                          | 1.016                           | 1.033                                           |
| 2160                              | 575                 | 581                          | 1.018                           | 1.037                                           | 531                               | 537                          | 1.020                           | 1.040                                           | 646                               | 652                          | 1.016                           | 1.033                                           |

**Table S6.** Calculated values of: slope of equation (5), diffusion coefficient of TO released in mm<sup>2</sup>/s and m<sup>2</sup>s, total film mass loss or total mass of TO released and % Film total weight loss or % total TO content released.

| sample         | Slope ( $4 \frac{D.t}{\pi.l^2}$ ) | D (mm <sup>2</sup> /s) | D(cm <sup>2</sup> /s)                          | Total film mass loss $m_0 - m_\infty$<br>or total mass of TO released<br>(mg) | % Film total weight loss<br>( $m_0 - m_\infty$ )/ $m_0$ *100 or % total<br>TO content released |
|----------------|-----------------------------------|------------------------|------------------------------------------------|-------------------------------------------------------------------------------|------------------------------------------------------------------------------------------------|
| LDPE/15TO@NZ_1 | 10 <sup>-4</sup>                  | 4.42E-07               | 4.42.10 <sup>-10</sup>                         | 10.0                                                                          | 1.69                                                                                           |
| LDPE/15TO@NZ_2 | 10 <sup>-4</sup>                  | 4.29866E-07            | 4.30.10 <sup>-10</sup>                         | 8.0                                                                           | 1.47                                                                                           |
| LDPE/15TO@NZ_3 | 10 <sup>-4</sup>                  | 5.80586E-07            | 5.81.10 <sup>-10</sup>                         | 13.0                                                                          | 1.95                                                                                           |
| average        | -                                 | -                      | 4.84.10 <sup>-13</sup> ±0.84.10 <sup>-13</sup> | 10.3±2.5                                                                      | 1.70±0.24                                                                                      |

## Pearson's Correlations

**Table S7.** pure LDPE control sample

| Confidence Intervals |                        |                 |                                                      |       |
|----------------------|------------------------|-----------------|------------------------------------------------------|-------|
|                      | Pearson<br>Correlation | Sig. (2-tailed) | 95% Confidence Intervals (2-<br>tailed) <sup>a</sup> |       |
|                      |                        |                 | Lower                                                | Upper |
| DAY0 - DAY2          | ,998                   | ,000            | ,976                                                 | 1,000 |
| DAY0 - DAY4          | ,998                   | ,000            | ,977                                                 | 1,000 |
| DAY0 - DAY6          | ,995                   | ,000            | ,939                                                 | ,999  |
| DAY0 - DAY8          | ,992                   | ,000            | ,905                                                 | ,999  |
| DAY0 - DAY10         | ,998                   | ,000            | ,971                                                 | 1,000 |
| DAY0 - DAY12         | ,818                   | ,047            | -,062                                                | ,976  |
| DAY2 - DAY4          | 1,000                  | ,000            | 1,000                                                | 1,000 |
| DAY2 - DAY6          | ,998                   | ,000            | ,975                                                 | 1,000 |
| DAY2 - DAY8          | ,997                   | ,000            | ,963                                                 | 1,000 |
| DAY2 - DAY10         | ,995                   | ,000            | ,942                                                 | ,999  |
| DAY2 - DAY12         | ,839                   | ,037            | ,004                                                 | ,979  |
| DAY4 - DAY6          | ,998                   | ,000            | ,975                                                 | 1,000 |
| DAY4 - DAY8          | ,997                   | ,000            | ,963                                                 | 1,000 |
| DAY4 - DAY10         | ,995                   | ,000            | ,943                                                 | ,999  |
| DAY4 - DAY12         | ,838                   | ,037            | ,000                                                 | ,979  |
| DAY6 - DAY8          | 1,000                  | ,000            | ,994                                                 | 1,000 |
| DAY6 - DAY10         | ,987                   | ,000            | ,860                                                 | ,998  |
| DAY6 - DAY12         | ,815                   | ,048            | -,072                                                | ,975  |
| DAY8 - DAY10         | ,984                   | ,000            | ,826                                                 | ,998  |
| DAY8 - DAY12         | ,823                   | ,044            | -,048                                                | ,976  |
| DAY10 - DAY12        | ,843                   | ,035            | ,015                                                 | ,979  |

a. Estimation is based on Fisher's r-to-z transformation with bias adjustment.



**Table S8.** LDPE/15NZ sample

| Confidence Intervals |                        |                 |                                                      |       |
|----------------------|------------------------|-----------------|------------------------------------------------------|-------|
|                      | Pearson<br>Correlation | Sig. (2-tailed) | 95% Confidence Intervals (2-<br>tailed) <sup>a</sup> |       |
|                      |                        |                 | Lower                                                | Upper |
| DAY0 - DAY2          | ,999                   | ,000            | ,986                                                 | 1,000 |
| DAY0 - DAY4          | ,998                   | ,000            | ,980                                                 | 1,000 |
| DAY0 - DAY6          | ,997                   | ,000            | ,969                                                 | 1,000 |
| DAY0 - DAY8          | ,999                   | ,000            | ,983                                                 | 1,000 |
| DAY0 - DAY10         | ,998                   | ,000            | ,980                                                 | 1,000 |
| DAY0 - DAY12         | ,979                   | ,001            | ,783                                                 | ,997  |
| DAY2 - DAY4          | 1,000                  | ,000            | ,999                                                 | 1,000 |
| DAY2 - DAY6          | ,999                   | ,000            | ,993                                                 | 1,000 |
| DAY2 - DAY8          | ,999                   | ,000            | ,989                                                 | 1,000 |
| DAY2 - DAY10         | ,995                   | ,000            | ,946                                                 | ,999  |
| DAY2 - DAY12         | ,973                   | ,001            | ,726                                                 | ,997  |
| DAY4 - DAY6          | ,999                   | ,000            | ,993                                                 | 1,000 |
| DAY4 - DAY8          | ,999                   | ,000            | ,985                                                 | 1,000 |
| DAY4 - DAY10         | ,994                   | ,000            | ,933                                                 | ,999  |
| DAY4 - DAY12         | ,972                   | ,001            | ,717                                                 | ,996  |
| DAY6 - DAY8          | ,999                   | ,000            | ,993                                                 | 1,000 |
| DAY6 - DAY10         | ,994                   | ,000            | ,936                                                 | ,999  |
| DAY6 - DAY12         | ,965                   | ,002            | ,659                                                 | ,996  |
| DAY8 - DAY10         | ,997                   | ,000            | ,968                                                 | 1,000 |
| DAY8 - DAY12         | ,968                   | ,002            | ,683                                                 | ,996  |
| DAY10 - DAY12        | ,975                   | ,001            | ,747                                                 | ,997  |

a. Estimation is based on Fisher's r-to-z transformation with bias adjustment.

**Table S9.** LDPE/15TO@NZ sample

| Confidence Intervals |                        |                 |                                                      |       |
|----------------------|------------------------|-----------------|------------------------------------------------------|-------|
|                      | Pearson<br>Correlation | Sig. (2-tailed) | 95% Confidence Intervals (2-<br>tailed) <sup>a</sup> |       |
|                      |                        |                 | Lower                                                | Upper |
| DAY0 - DAY2          | ,999                   | ,000            | ,983                                                 | 1,000 |
| DAY0 - DAY4          | ,999                   | ,000            | ,986                                                 | 1,000 |
| DAY0 - DAY6          | ,999                   | ,000            | ,983                                                 | 1,000 |
| DAY0 - DAY8          | ,997                   | ,000            | ,969                                                 | 1,000 |
| DAY0 - DAY10         | ,998                   | ,000            | ,972                                                 | 1,000 |
| DAY0 - DAY12         | ,940                   | ,005            | ,474                                                 | ,992  |
| DAY2 - DAY4          | ,999                   | ,000            | ,994                                                 | 1,000 |
| DAY2 - DAY6          | 1,000                  | ,000            | 1,000                                                | 1,000 |
| DAY2 - DAY8          | 1,000                  | ,000            | ,995                                                 | 1,000 |
| DAY2 - DAY10         | ,999                   | ,000            | ,991                                                 | 1,000 |
| DAY2 - DAY12         | ,956                   | ,003            | ,583                                                 | ,994  |
| DAY4 - DAY6          | ,999                   | ,000            | ,992                                                 | 1,000 |
| DAY4 - DAY8          | ,998                   | ,000            | ,978                                                 | 1,000 |
| DAY4 - DAY10         | ,998                   | ,000            | ,972                                                 | 1,000 |
| DAY4 - DAY12         | ,948                   | ,004            | ,524                                                 | ,993  |
| DAY6 - DAY8          | 1,000                  | ,000            | ,996                                                 | 1,000 |
| DAY6 - DAY10         | ,999                   | ,000            | ,993                                                 | 1,000 |
| DAY6 - DAY12         | ,956                   | ,003            | ,587                                                 | ,994  |
| DAY8 - DAY10         | 1,000                  | ,000            | ,997                                                 | 1,000 |
| DAY8 - DAY12         | ,962                   | ,002            | ,635                                                 | ,995  |
| DAY10 - DAY12        | ,961                   | ,002            | ,624                                                 | ,995  |

a. Estimation is based on Fisher's r-to-z transformation with bias adjustment.
